# Supplementary material for: A popular Indian clove-based mosquito repellent is less effective against Culex quinquefasciatus and Aedes aegypti than DEET
Source: PubMed Central journal article supplement (PMC6830767; doi:10.1371/journal.pone.0224810), 2019-11-05
Supplement: pone.0224810.s001.pdf [file pone.0224810.s001.pdf]

| <b>Raw Data for Figure 3</b> |       |       |
|------------------------------|-------|-------|
| <b>Portuense</b>             |       |       |
| Day-4                        | Day-5 | Day-6 |
| 6.41                         | 7.9   | 11.68 |
| 4.49                         | 7.01  | 9.48  |
| 4.23                         | 5.71  | 7.06  |
|                              |       |       |
| <b>Beija Flor</b>            |       |       |
| Day-4                        | Day-5 | Day-6 |
| 11.71                        | 15.27 | 15.33 |
| 12.78                        | 15.56 | 19.1  |
| 10.45                        | 13.41 | 15.92 |
|                              |       |       |
| <b>Kitano</b>                |       |       |
| Day-4                        | Day-5 | Day-6 |
| 11.71                        | 15.27 | 15.33 |
| 12.78                        | 15.56 | 19.1  |
| 10.45                        | 13.41 | 15.92 |

| <b>Raw Data for Figure 4</b>                |         |  |              |         |
|---------------------------------------------|---------|--|--------------|---------|
| <b>Panel A- <i>Cx. quinquefasciatus</i></b> |         |  |              |         |
| 1% DEET                                     | Solvent |  | Extract (BF) | Solvent |
| 4                                           | 22      |  | 6            | 28      |
| 1                                           | 26      |  | 9            | 30      |
| 2                                           | 22      |  | 7            | 20      |
| 3                                           | 27      |  | 6            | 26      |
| 1                                           | 15      |  | 5            | 18      |
| 2                                           | 17      |  | 6            | 20      |
| 3                                           | 11      |  | 0            | 4       |
| 0                                           | 10      |  | 7            | 11      |
| <b>Panel B- <i>Cx. quinquefasciatus</i></b> |         |  |              |         |
| 1% DEET                                     | Solvent |  | 1% Eugenol   | Solvent |
| 0                                           | 12      |  | 1            | 9       |
| 0                                           | 11      |  | 3            | 6       |
| 0                                           | 7       |  | 3            | 10      |
| 0                                           | 7       |  | 2            | 9       |
| 0                                           | 10      |  | 3            | 9       |
| 0                                           | 9       |  | 4            | 9       |
| 1                                           | 9       |  | 0            | 6       |
| 0                                           | 7       |  | 0            | 9       |
| <b>Panel C - <i>Ae. aegypti</i></b>         |         |  |              |         |
| 1% DEET                                     | Solvent |  | Extract (BF) | Solvent |
| 6                                           | 28      |  | 7            | 28      |
| 8                                           | 20      |  | 10           | 23      |
| 5                                           | 16      |  | 9            | 21      |
| 2                                           | 18      |  | 10           | 18      |
| 2                                           | 12      |  | 4            | 8       |
| 4                                           | 17      |  | 6            | 13      |
| 3                                           | 18      |  | 6            | 21      |
| 5                                           | 19      |  | 8            | 12      |
| 2                                           | 14      |  | 6            | 17      |
| 4                                           | 13      |  | 4            | 15      |
